# Supplementary material
Source: PubMed Central journal article supplement (PMC3368624)

## Supporting Information

# Engineering a GPCR – Ligand Pair that Simulates the Activation of D<sub>2L</sub> by Dopamine

Nuska Tschammer, Miriam Dörfler, Harald Hübner, Peter Gmeiner\*

Department of Chemistry and Pharmacy, Emil Fischer Center, Friedrich-Alexander-  
University, Schuhstr. 19, 91052 Erlangen, Germany.

**Table 1.** Receptor binding data for dopamine, the test compounds **3** and **5a-c** at the porcine dopamine D<sub>1</sub>, serotonin 5-HT<sub>1A</sub>, 5-HT<sub>2</sub> and adrenergic α<sub>1</sub> receptor as well as the human dopamine D<sub>2L</sub>, D<sub>2S</sub>, D<sub>3</sub> and D<sub>4.4</sub> receptors.

| Compound      | K <sub>i</sub> values (nM) ± SEM |                  |                          |                 |                   |                           |                           |                         |
|---------------|----------------------------------|------------------|--------------------------|-----------------|-------------------|---------------------------|---------------------------|-------------------------|
|               | <sup>3</sup> H SCH 23390         |                  | <sup>3</sup> H spiperone |                 |                   | <sup>3</sup> H WAY 100635 | <sup>3</sup> H ketanserin | <sup>3</sup> H prazosin |
|               | pD <sub>1</sub>                  | hD <sub>2L</sub> | hD <sub>2S</sub>         | hD <sub>3</sub> | hD <sub>4.4</sub> | p5-HT <sub>1A</sub>       | p5-HT <sub>2</sub>        | pα <sub>1</sub>         |
| <b>3</b>      | 13000 ± 500                      | 370 ± 66         | 89 ± 16                  | 44 ± 5.5        | 175 ± 17          | 200 ± 74                  | 9800 ± 3400               | 1800 ± 0                |
| <b>5a</b>     | 1100 ± 0                         | 44 ± 3.8         | 43 ± 8.1                 | 0.35 ± 0.041    | 7.2 ± 0.53        | 22 ± 0.50                 | 570 ± 140                 | 89 ± 8.0                |
| <b>5b</b>     | 4300 ± 100                       | 23 ± 3.3         | 8.2 ± 0.99               | 0.52 ± 0.048    | 0.51 ± 0.043      | 0.70 ± 0.11               | 360 ± 10                  | 38 ± 1.5                |
| <b>(R)-5c</b> | 1800 ± 500                       | 11 ± 1.6         | 5.3 ± 0.94               | 0.24 ± 0.027    | 1.2 ± 0.049       | 14 ± 5.3                  | 2000 ± 700                | 62 ± 17                 |
| <b>(S)-5c</b> | 1000 ± 80                        | 40 ± 7.5         | 8.6 ± 2.8                | 0.47 ± 0.025    | 0.50 ± 0.026      | 5.8 ± 0                   | 1400 ± 860                | 32 ± 0.50               |

Mean K<sub>i</sub> values with SEM are derived from 2-10 experiments, each done in triplicate.

**Figure 1.** The mutant receptor D<sub>2L</sub>F6.52W is not activated by the endogenous ligand dopamine but is fully functional under synthetic ligands. Mean curves with error bars representing the SEM are shown. (A) The incorporation of the [<sup>35</sup>S]GTP<sub>γ</sub>S was measured on membrane preparations of stably transfected CHO cells that expressed the D<sub>2L</sub>F390<sup>6.52</sup>W receptor, treated with dopamine or quinpirole. No detectable [<sup>35</sup>S]GTP<sub>γ</sub>S incorporation was measured after dopamine treatment, whereas the EC<sub>50</sub> value of quinpirole was 1500 nM. (B) The inhibitory effect of dopamine or quinpirole on cAMP accumulation was measured in stably transfected CHO cells that expressed the D<sub>2L</sub>F390<sup>6.52</sup>W receptor after stimulation of the adenylyl cyclase in the presence of 20 μM forskolin. No detectable cAMP inhibition was measured in the presence of dopamine; the EC<sub>50</sub> value of quinpirole was 500 nM. (C) The suppression of quinpirole mediated the [<sup>35</sup>S]GTP<sub>γ</sub>S incorporation was measured on membrane preparation of stably transfected CHO cells that expressed the D<sub>2L</sub>F390<sup>6.52</sup>W receptor. After prestimulation of receptor with 0.1 mM quinpirole the suppression of this effect was determined by increasing concentrations of the antagonist spiperone with an EC<sub>50</sub> value of 2.6 nM. (D) The suppression of the inhibition of cAMP accumulation was measured in the stably transfected CHO cells that expressed the D<sub>2L</sub>F390<sup>6.52</sup>W receptor after prestimulation with 5 μM quinpirole and 20 μM forskolin with increasing concentrations of the antagonist spiperone with an EC<sub>50</sub> value of 6.6 nM.

Figure 1.

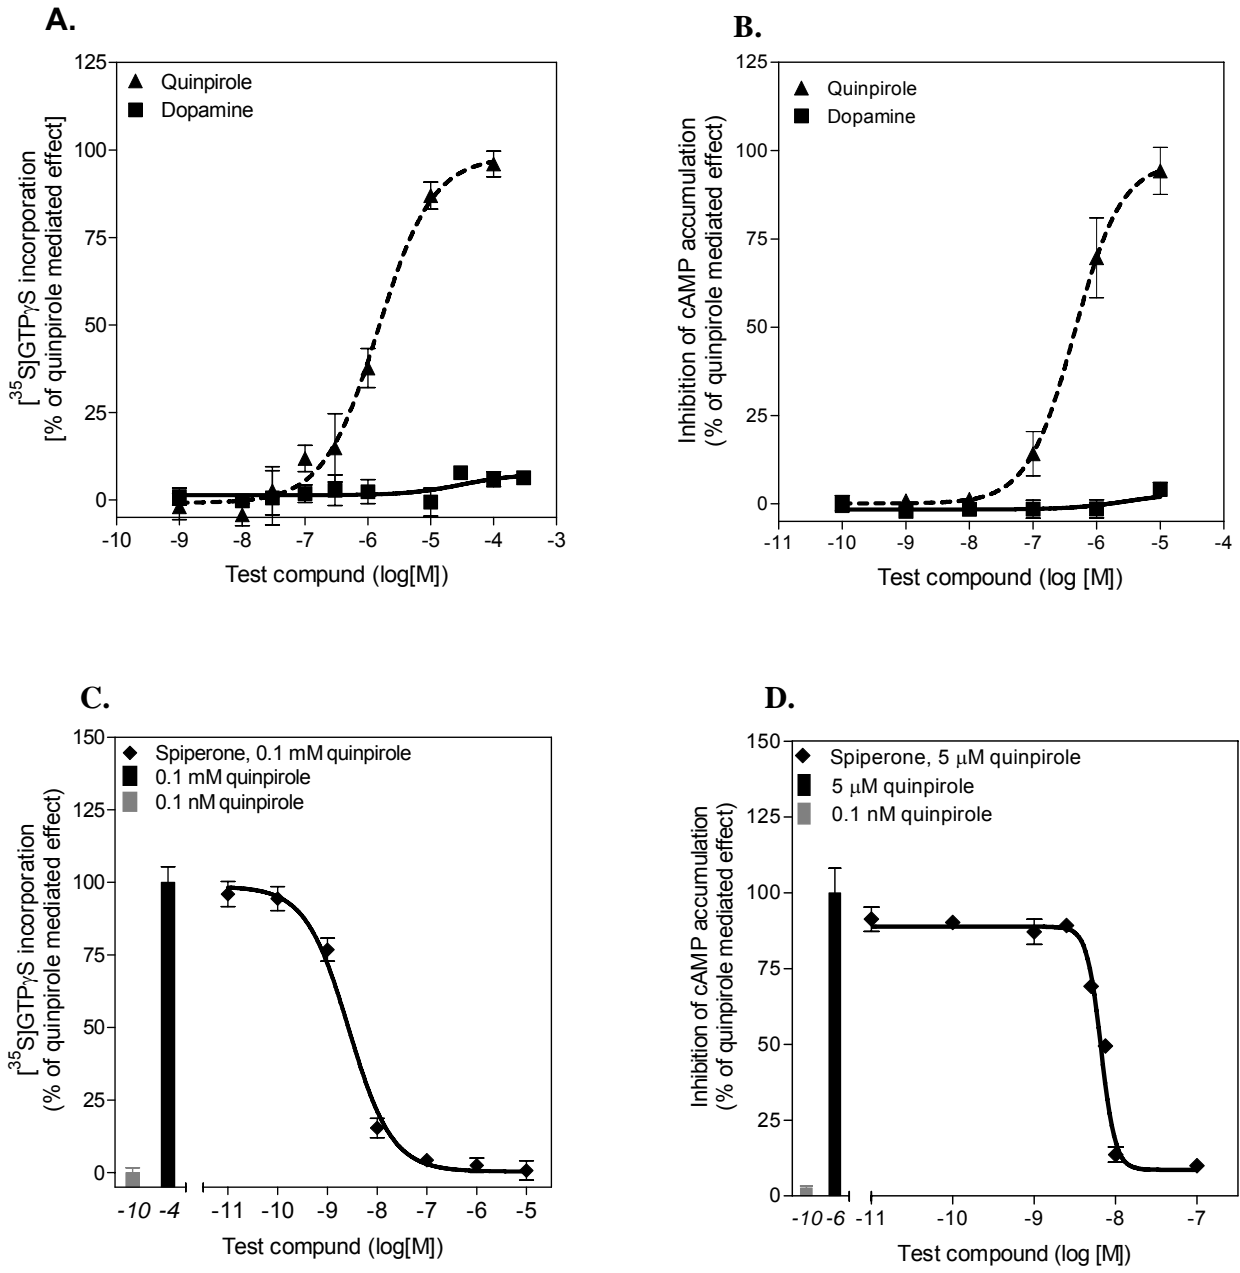

**Figure 2:** The potential antagonistic effect of dopamine on quinpirole stimulated inhibition of cAMP accumulation was measured in stably transfected CHO cells that expressed the D<sub>2L</sub>F390<sup>6.52</sup>W receptor after stimulation of the adenylyl cyclase in the presence of 20μM forskolin. Dopamine was not able to antagonize quinpirole stimulated inhibition of cAMP accumulation.

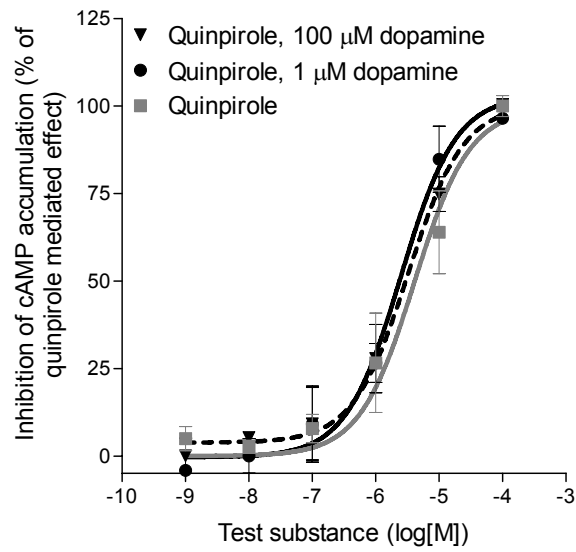

**(N-Indan-2-yl-N-propyl)-4-aminobutyronitrile (4a)**

**<sup>1</sup>H-NMR:**

<sup>1</sup>H (360 MHz, CDCl<sub>3</sub>):

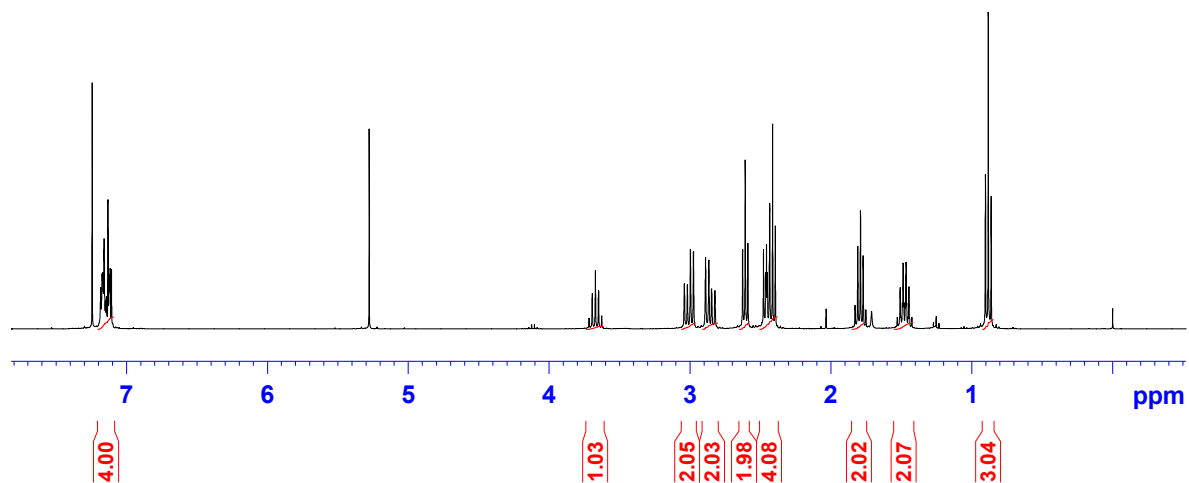

**<sup>13</sup>C-NMR:**

<sup>13</sup>C (150 MHz, CDCl<sub>3</sub>):

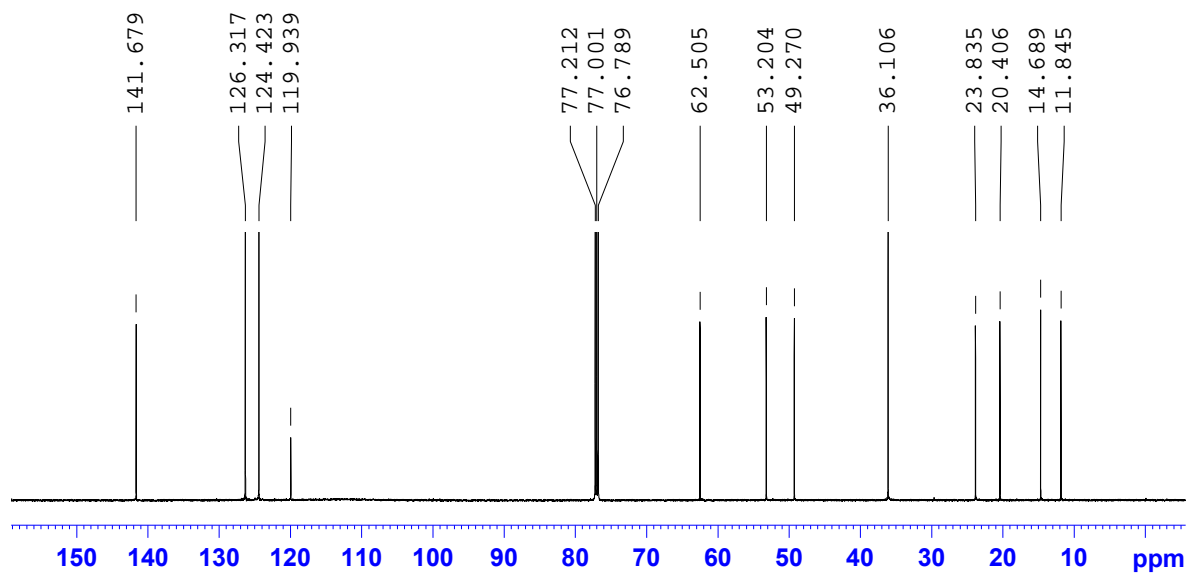

***N*-[(*N*-Indan-2-yl-*N*'-propyl)-4-aminobutyl]-4-biphenyl carboxamide (5a)**

**<sup>1</sup>H-NMR:**

<sup>1</sup>H (360 MHz, CDCl<sub>3</sub>):

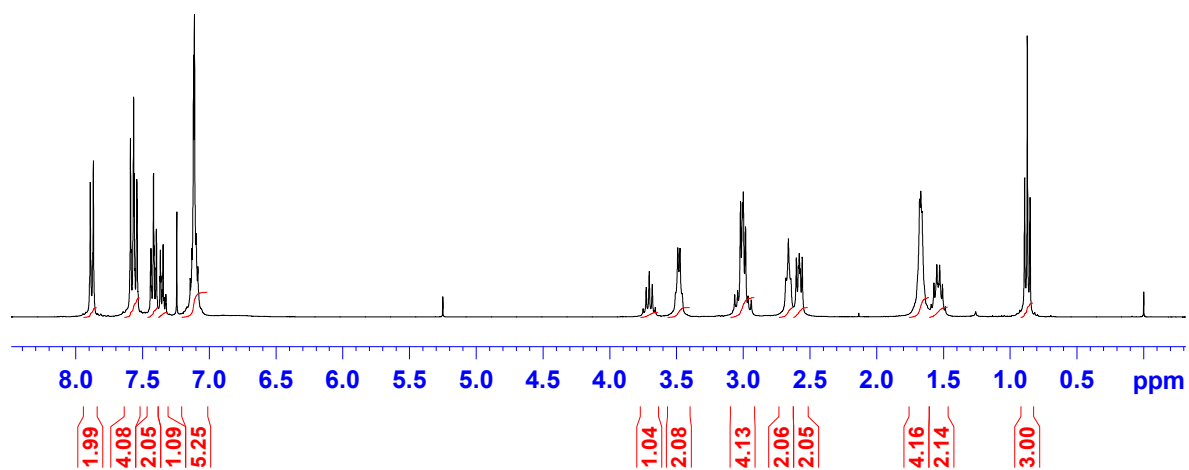

**<sup>13</sup>C-NMR:**

<sup>13</sup>C (150 MHz, CDCl<sub>3</sub>):

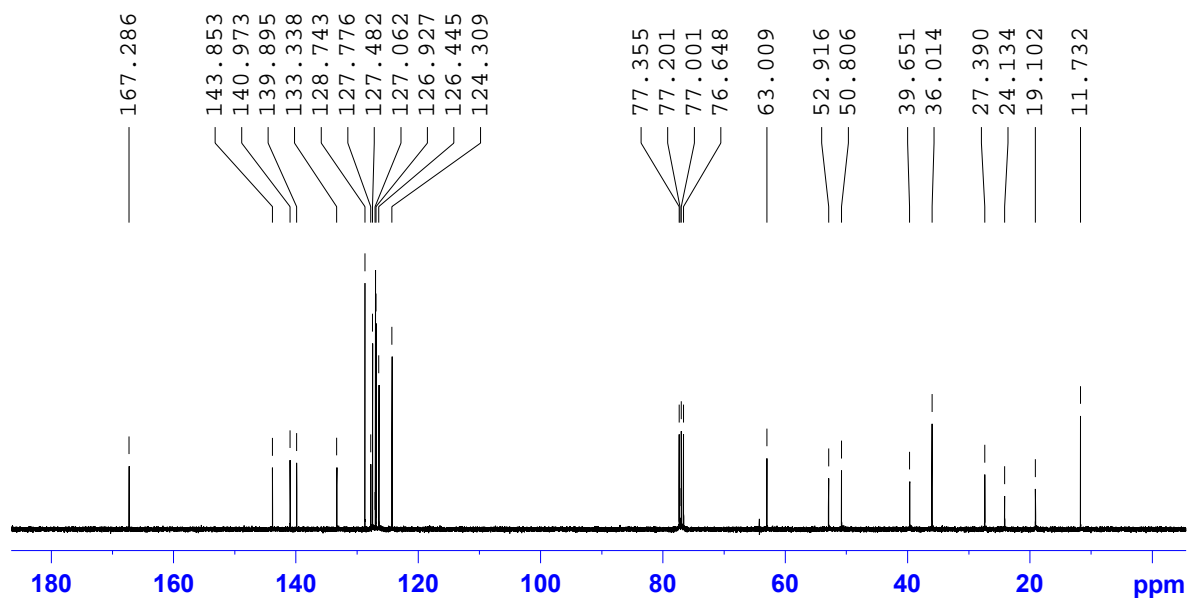

***N*-[*N*-Indan-2-yl-*N*'-propyl]-4-aminobutyl]ferrocenyl carboxamide (5b)**

**<sup>1</sup>H-NMR:**

<sup>1</sup>H (600 MHz, CDCl<sub>3</sub>):

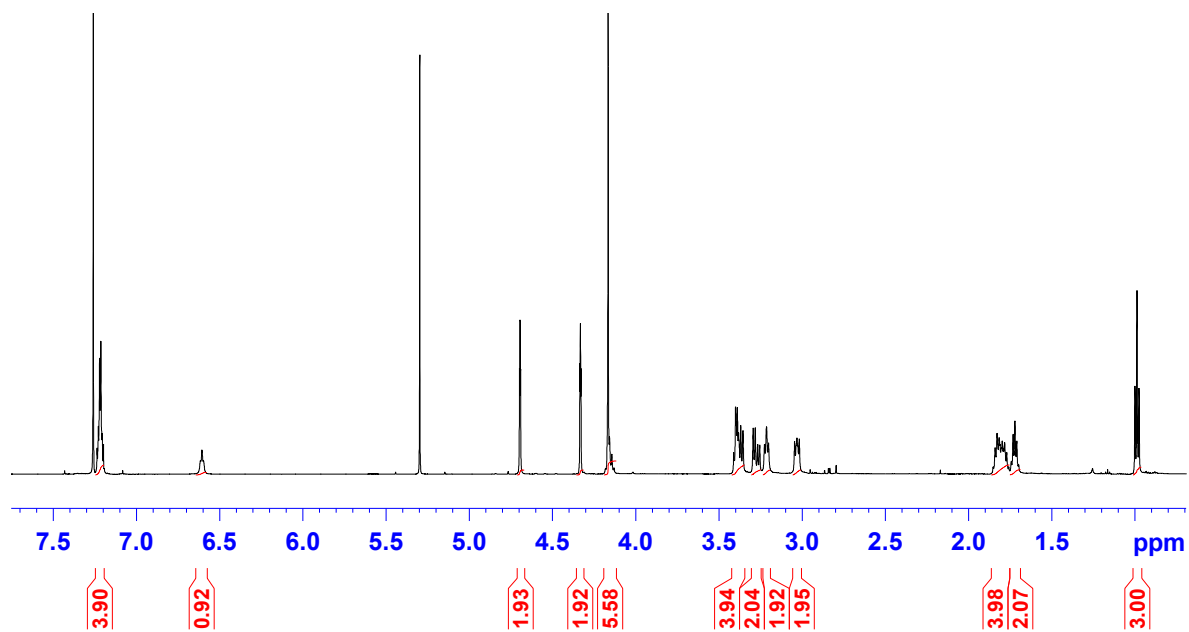

**<sup>13</sup>C-NMR:**

<sup>13</sup>C (90 MHz, CDCl<sub>3</sub>):

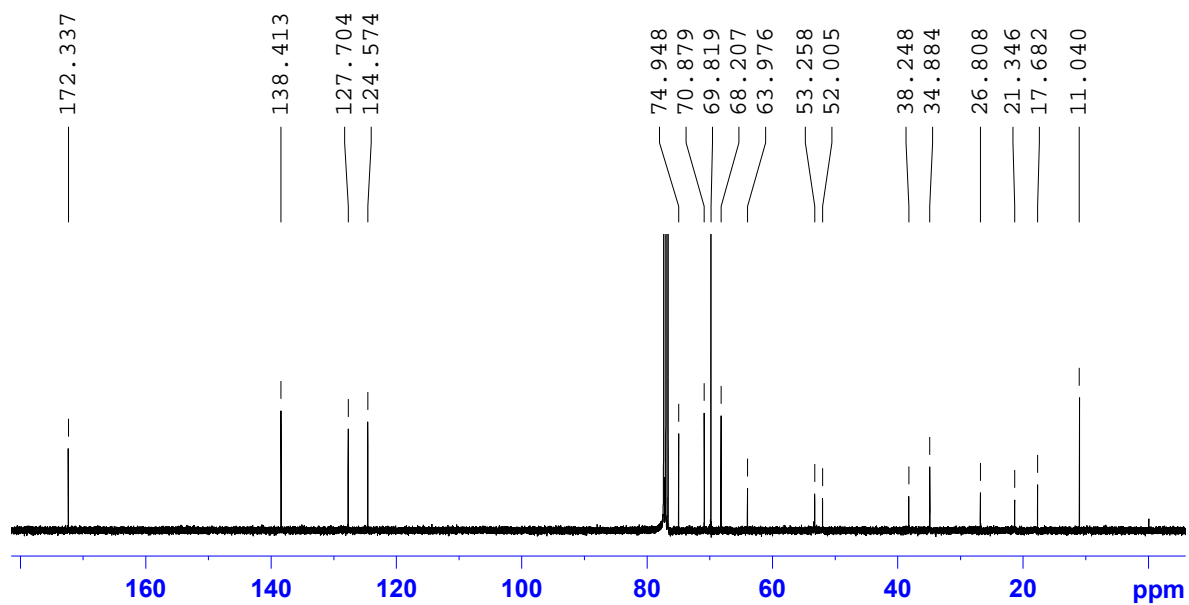



***N*-[(*N*-Indan-2-yl-*N*'-propyl)-4-aminobutyl]-(*R*)-[2.2]paracyclophane carboxamide  
(*R*)-5c**

**<sup>1</sup>H-NMR:**

<sup>1</sup>H (360 MHz, CDCl<sub>3</sub>):

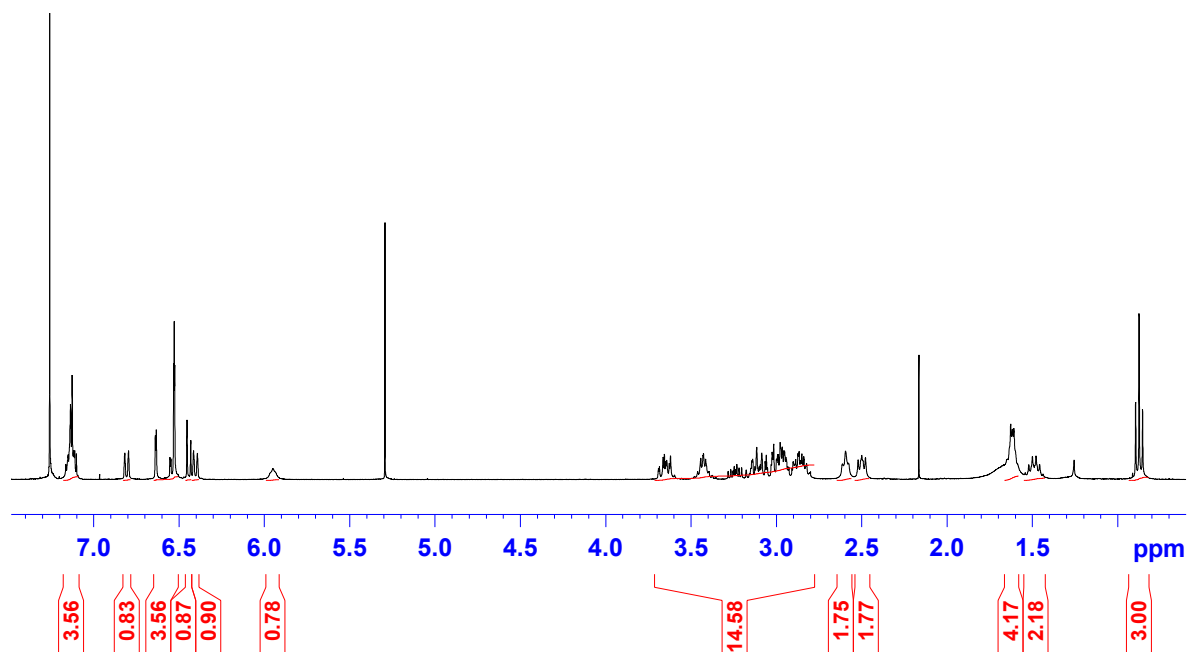

**<sup>13</sup>C-NMR:**

<sup>13</sup>C (90 MHz, CDCl<sub>3</sub>):

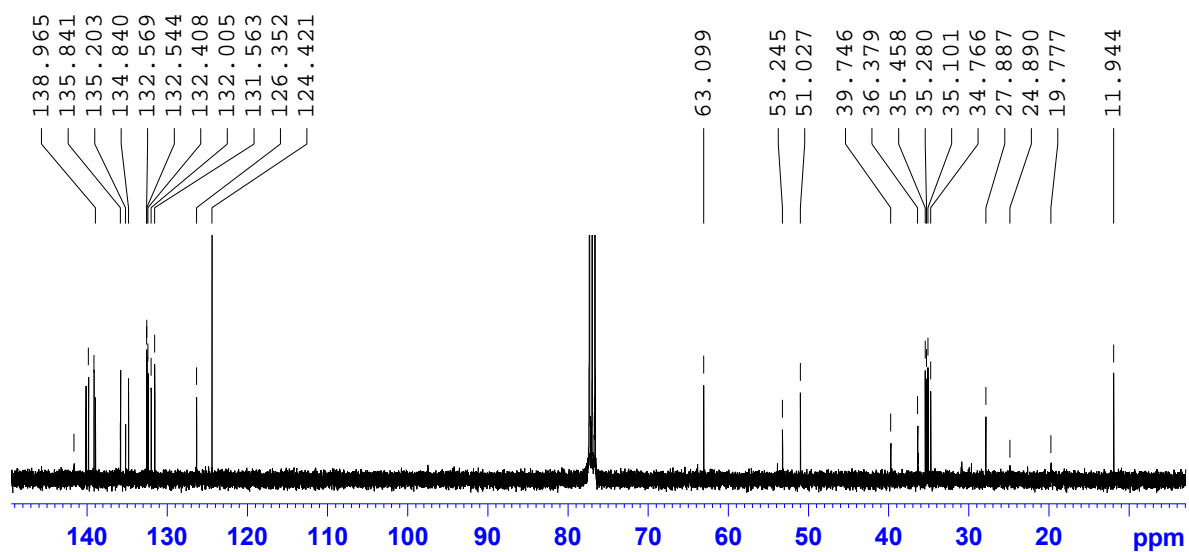

***N*-[(*N*-Indan-2-yl-*N*'-propyl)-4-aminobutyl]-(*S*)-[2.2]paracyclophane carboxamide  
**((*S*)-5c)****

**<sup>1</sup>H-NMR:**

<sup>1</sup>H (360 MHz, CDCl<sub>3</sub>):

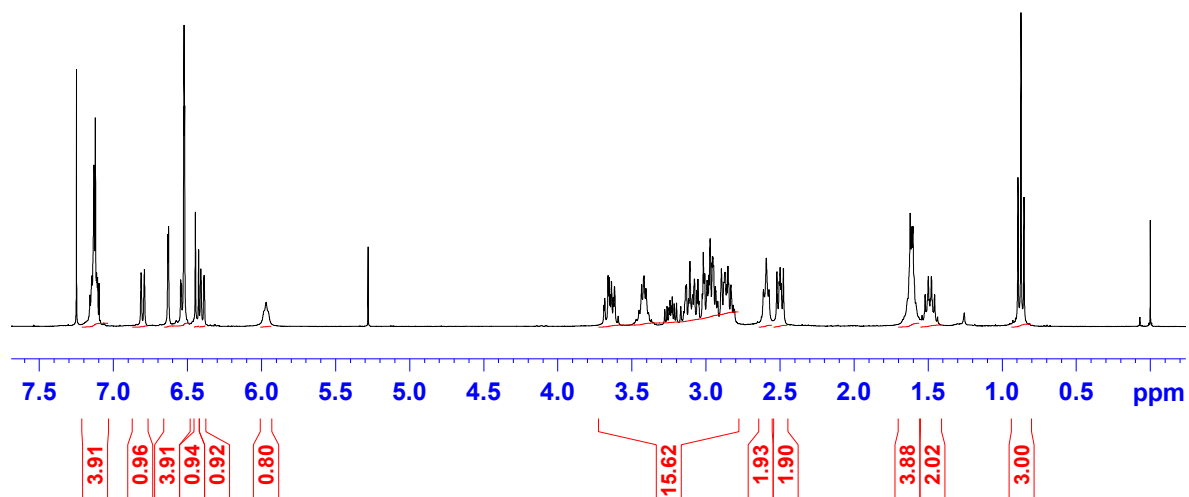

**<sup>13</sup>C-NMR:**

<sup>13</sup>C (150 MHz, CDCl<sub>3</sub>):

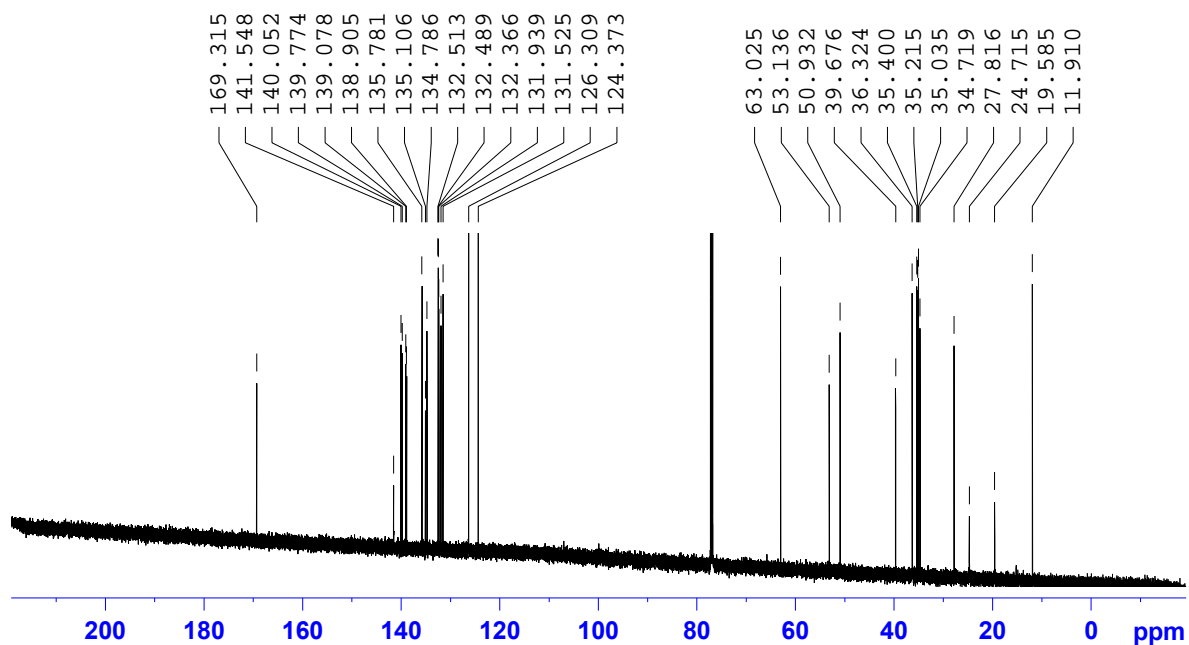

Supplement: cn900001b_si_001.pdf [file cn900001b_si_001.pdf]
